# Supplementary material for: Differences of Excess and Deficiency Zheng in Patients with Chronic Hepatitis B by Urinary Metabonomics
Source: Hindawi journal article supplement (doi:10.1155/2013/738245), 2013-01-01
Supplement: f1 [file 738245.f1.pdf]

### 1. 115 items of TCM symptoms

| No | TCM symptoms                      | Abbreviation       |
|----|-----------------------------------|--------------------|
| 1  | Resting heart rate                | Resting_heart_rate |
| 2  | Systolic blood pressure           | Ssy                |
| 3  | Diastolic blood pressure          | Szy                |
| 4  | Headache                          | A0101              |
| 5  | Dizziness                         | A0102              |
| 6  | Dizziness heavy                   | A0103              |
| 7  | Giddiness                         | A0104              |
| 8  | Eyelids heavy                     | A0105              |
| 9  | Depending on the material fatigue | A0106              |
| 10 | Red eyes                          | A0107              |
| 11 | Head dry                          | A0108              |
| 12 | Tinnitus                          | A0109              |
| 13 | Epistaxis                         | A0110              |
| 14 | Dry nose                          | A0111              |
| 15 | Dark lip Violet                   | A0112              |
| 16 | Bitter taste in the mouth         | A0113              |
| 17 | Pale mouth                        | A0114              |
| 18 | Tired mouth                       | A0115              |
| 19 | Thirst                            | A0116              |
| 20 | Bad breath                        | A0117              |
| 21 | Mouth sores                       | A0118              |
| 22 | Bleeding gums                     | A0119              |
| 23 | Sore gums                         | A0120              |
| 24 | Loose teeth                       | A0121              |
| 25 | Dry throat                        | A0122              |
| 26 | Sore throat                       | A0123              |
| 27 | Taixi                             | A0124              |
| 28 | Yawn                              | A0125              |
| 29 | Eructation                        | A0126              |
| 30 | Spontaneous                       | A0127              |
| 31 | Night sweat                       | A0128              |
| 32 | Palpitations                      | A0129              |
| 33 | Chest tightness                   | A0130              |
| 34 | Sleepiness                        | A0131              |
| 35 | Insomnia                          | A0132              |
| 36 | More than a dream                 | A0133              |
| 37 | Forgetful                         | A0134              |
| 38 | Bellyache                         | A0135              |
| 39 | Bloating                          | A0136              |
| 40 | Epigastric pain                   | A0137              |
| 41 | Epigastric pain                   | A0138              |

|    |                             |         |
|----|-----------------------------|---------|
| 42 | Epigastric tingling         | A0139   |
| 43 | Tunsuan                     | A0140   |
| 44 | Abdominal nausea            | A0141   |
| 45 | Anorexia                    | A0142   |
| 46 | Nausea and vomiting         | A0143   |
| 47 | Hiccups                     | A0144   |
| 48 | Lassitude                   | A0145   |
| 49 | Flank pain                  | A0146   |
| 50 | Flank pain                  | A0147   |
| 51 | Flank tingling              | A0148   |
| 52 | Irritability                | A0149   |
| 53 | Lumbago                     | A0150   |
| 54 | Waist cold                  | A0151   |
| 55 | Backache                    | A0152   |
| 56 | Soft knee                   | A0153   |
| 57 | Five upset hot              | A0154   |
| 58 | Afternoon hot flashes       | A0155   |
| 59 | Bowel                       | A0156   |
| 60 | Loose stools                | A0157   |
| 61 | Constipation                | A0158   |
| 62 | Stool foul smell            | A0159   |
| 63 | Tenesmus                    | A0160   |
| 64 | Nocturia Kiyonaga           | A0161   |
| 65 | Yellow urine                | A0162   |
| 66 | Who heads yellow            | A0163   |
| 67 | Pale complexion             | A0164   |
| 68 | Looking dull                | A0165   |
| 69 | Pale white                  | A0166   |
| 70 | Facial redness              | A0167   |
| 71 | Angioma                     | A0168   |
| 72 | Liver palms                 | A0169   |
| 73 | Itchy skin                  | A0170   |
| 74 | Skin a mistake              | A0171   |
| 75 | Skin purpura                | A0172   |
| 76 | Numbness                    | A0173   |
| 77 | Limb heaviness              | A0174   |
| 78 | Joint pain                  | A0175   |
| 79 | Men's wet dream             | A0176   |
| 80 | Menstrual flow              | A0177   |
| 81 | Menstruation                | A0178   |
| 82 | Vaginal discharge volume    | A0179   |
| 83 | Vaginal discharge gas smell | A0180   |
| 84 | Tongue color                | t_color |

|     |                            |                  |
|-----|----------------------------|------------------|
| 85  | Tongue color parts         | t_color_position |
| 86  | Noted in the tongue color  | t_color_notes    |
| 87  | Ups and downs              | t_shape_1        |
| 88  | Laonen                     | t_shape_2        |
| 89  | Fat, thin                  | t_shape_3        |
| 90  | Indented                   | t_shape_4        |
| 91  | Prick                      | t_shape_5        |
| 92  | Crack                      | t_shape_6        |
| 93  | Ecchymosis                 | t_shape_7        |
| 94  | Bohou                      | t_c_qlty_1       |
| 95  | Run less Tianjin dry rough | t_c_qlty_2       |
| 96  | Tired of rot               | t_c_qlty_3       |
| 97  | Less moss no moss          | t_c_qlty_4       |
| 98  | Exfoliative                | t_c_qlty_5       |
| 99  | Moss quality parts         | t_c_q_position   |
| 100 | An moss qualitative marked | t_c_q_notes      |
| 101 | Moss color                 | t_coat           |
| 102 | Moss color parts           | t_coat_position  |
| 103 | Noted in the moss color    | t_coat_notes     |
| 104 | Sublingual vein            | t_vein           |
| 105 | Ups and downs              | pulse_1          |
| 106 | fast and slow              | pulse_2          |
| 107 | deficiency and excess      | pulse_3          |
| 108 | Length of pulse            | pulse_4          |
| 109 | string pulse               | pulse_5          |
| 110 | thin pulse                 | pulse_6          |
| 111 | Slippery pulse             | pulse_7          |
| 112 | Mild pulse                 | pulse_8          |
| 113 | slow pulse                 | pulse_9          |
| 114 | Astringent pulse           | pulse_10         |
| 115 | Weak pulse                 | pulse_11         |

## 2. 67 items of biochemistry indicators

| Number | indicators | Number | indicators          |
|--------|------------|--------|---------------------|
| 1      | TBIL       | 35     | Uric acid           |
| 2      | DBIL       | 36     | Glucose             |
| 3      | IDBIL      | 37     | TC                  |
| 4      | ALT        | 38     | TG                  |
| 5      | AST        | 39     | HDL-C               |
| 6      | GGT        | 40     | LDL-C               |
| 7      | ALP        | 41     | APOA-1              |
| 8      | TP         | 42     | Albumin             |
| 9      | ALB        | 43     | $\alpha$ 1 globulin |

|    |                   |    |                                      |
|----|-------------------|----|--------------------------------------|
| 10 | Pre-Alb           | 44 | $\alpha$ 2 globulin                  |
| 11 | Bile acid         | 45 | $\beta$ -globin                      |
| 12 | PT                | 46 | $\gamma$ -globulin                   |
| 13 | TT                | 47 | Basophil                             |
| 14 | APTT              | 48 | Basophil%                            |
| 15 | HBsAg             | 49 | Eosinophils                          |
| 16 | HBsAb             | 50 | Eosinophils%                         |
| 17 | HBeAg             | 51 | Hemoglobin                           |
| 18 | HBeAb             | 52 | Lymphocytes                          |
| 19 | HBcAb             | 53 | Lymphocytes%                         |
| 20 | HbcAb-IgM         | 54 | Mean hemoglobin                      |
| 21 | Pre-S1 antigen    | 55 | The average hemoglobin concentration |
| 22 | Pre-S1 antibodies | 56 | Mean corpuscular volume              |
| 23 | HBV-DNA           | 57 | Monocytes                            |
| 24 | Protein           | 58 | % Of monocytes                       |
| 25 | Hand-protein      | 59 | Mean platelet volume                 |
| 26 | Proportion        | 60 | Neutrophil                           |
| 27 | CD3               | 61 | Neutrophils%                         |
| 28 | CD4 +             | 62 | Platelet hematocrit                  |
| 29 | CD8 +             | 63 | Platelet distribution width          |
| 30 | IgA               | 64 | Blood platelet                       |
| 31 | IgM               | 65 | Erythrocyte                          |
| 32 | IgG               | 66 | Red cell distribution width          |
| 33 | BUN               | 67 | Leukocyte                            |
| 34 | Cr                |    |                                      |
